# Supplementary material
Source: Springer Nature journal article supplement (https://www.springermedizin.de/resource/supplementary/12884_2012_730_MOESM4_ESM.pdf/9458564)

Strongly agree   Agree   Neither agree or disagree   Disagree   Strongly disagree

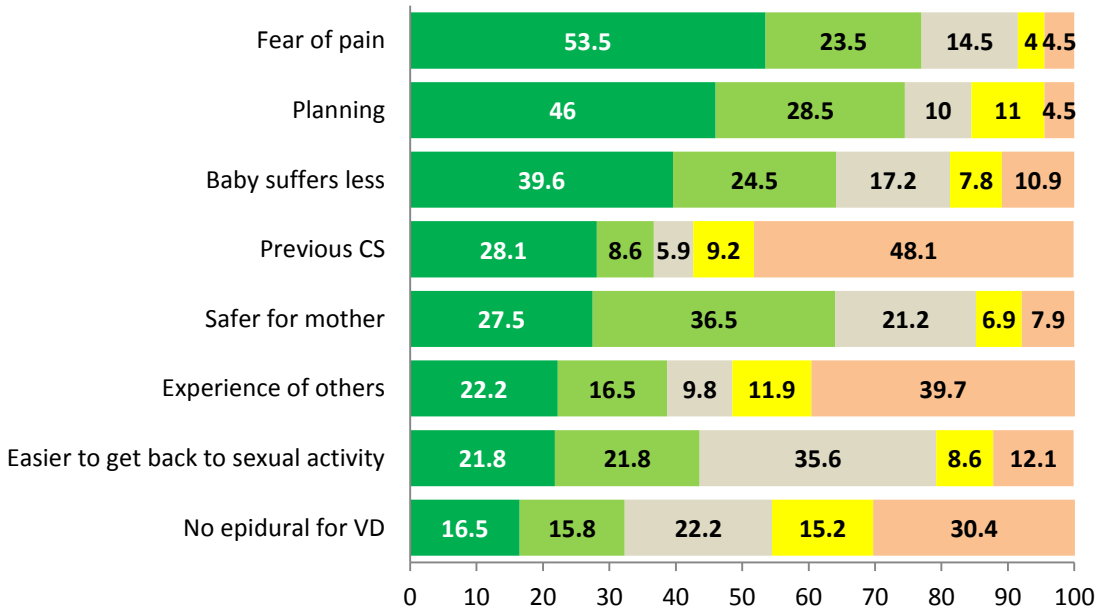

Supplement: MOESM4 [file 9458564]
